# Supplementary material for: Comparison of variations detection between whole-genome amplification methods used in single-cell resequencing
Source: PubMed Central journal article supplement (PMC4527218; doi:10.1186/s13742-015-0068-3), 2015-08-06

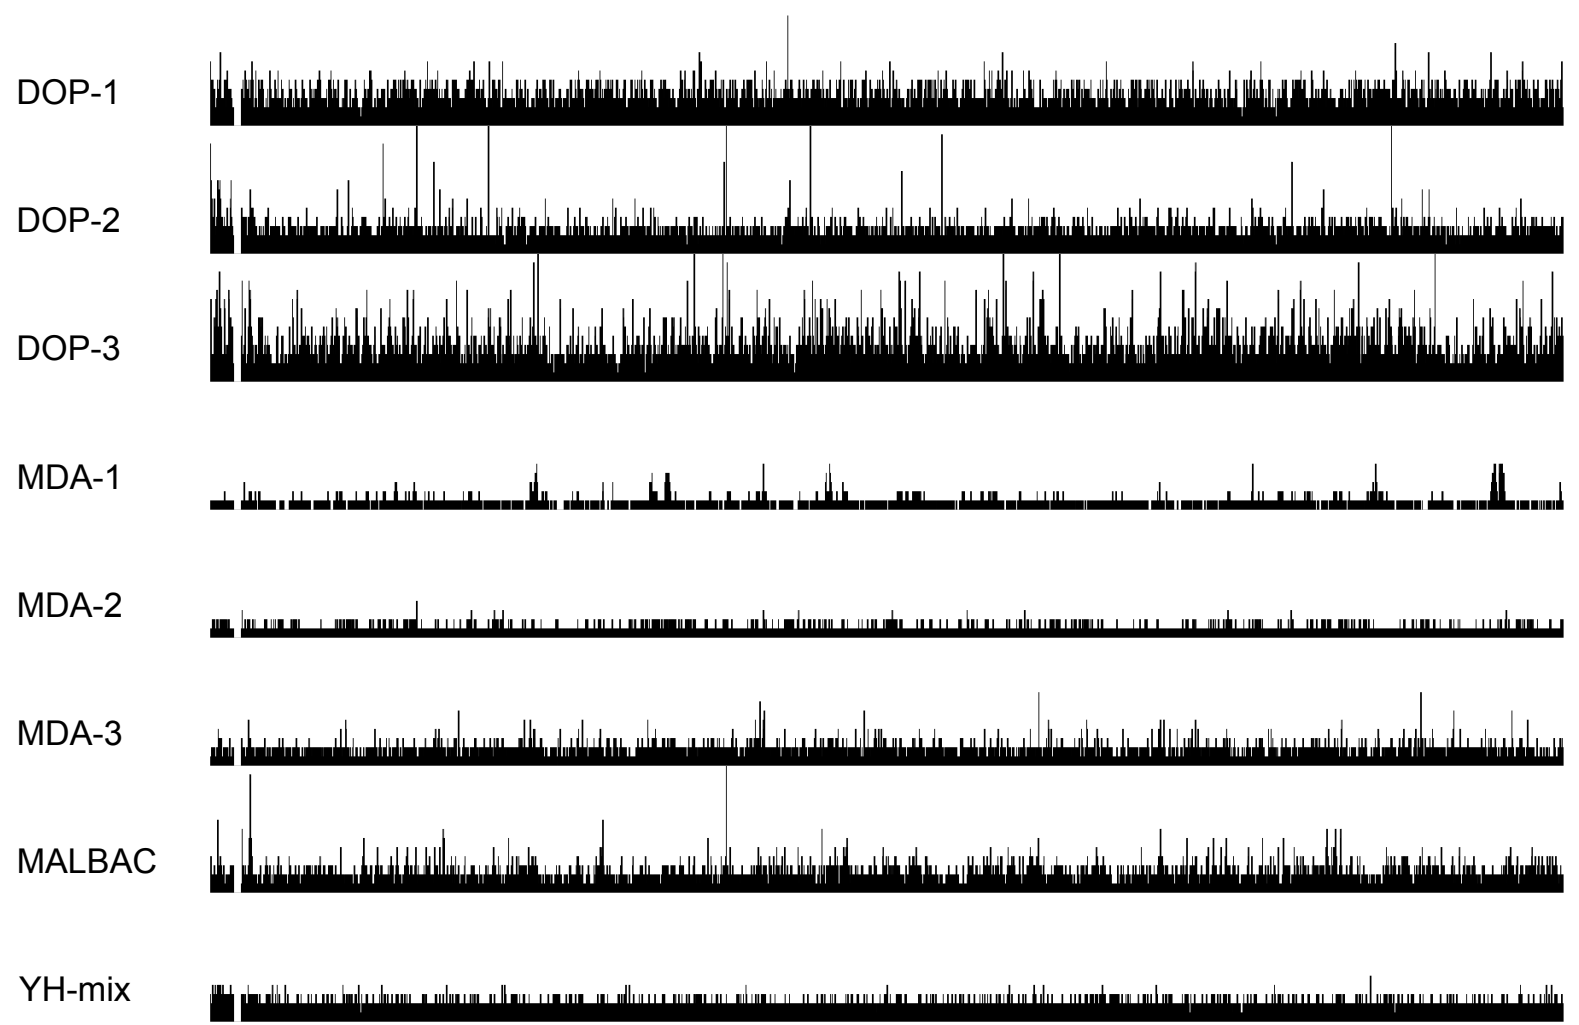

chr15 (q11.1-q26.3)

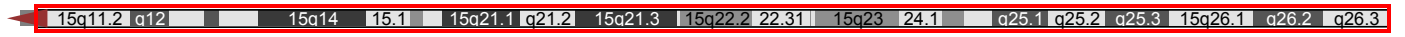

Supplement: 13742_2015_68_MOESM9_ESM.pdf [file 13742_2015_68_MOESM9_ESM.pdf]
