# Supplementary material for: Comparison of variations detection between whole-genome amplification methods used in single-cell resequencing
Source: PubMed Central journal article supplement (PMC4527218; doi:10.1186/s13742-015-0068-3), 2015-08-06
Supplement: 13742_2015_68_MOESM10_ESM.pdf [file 13742_2015_68_MOESM10_ESM.pdf]

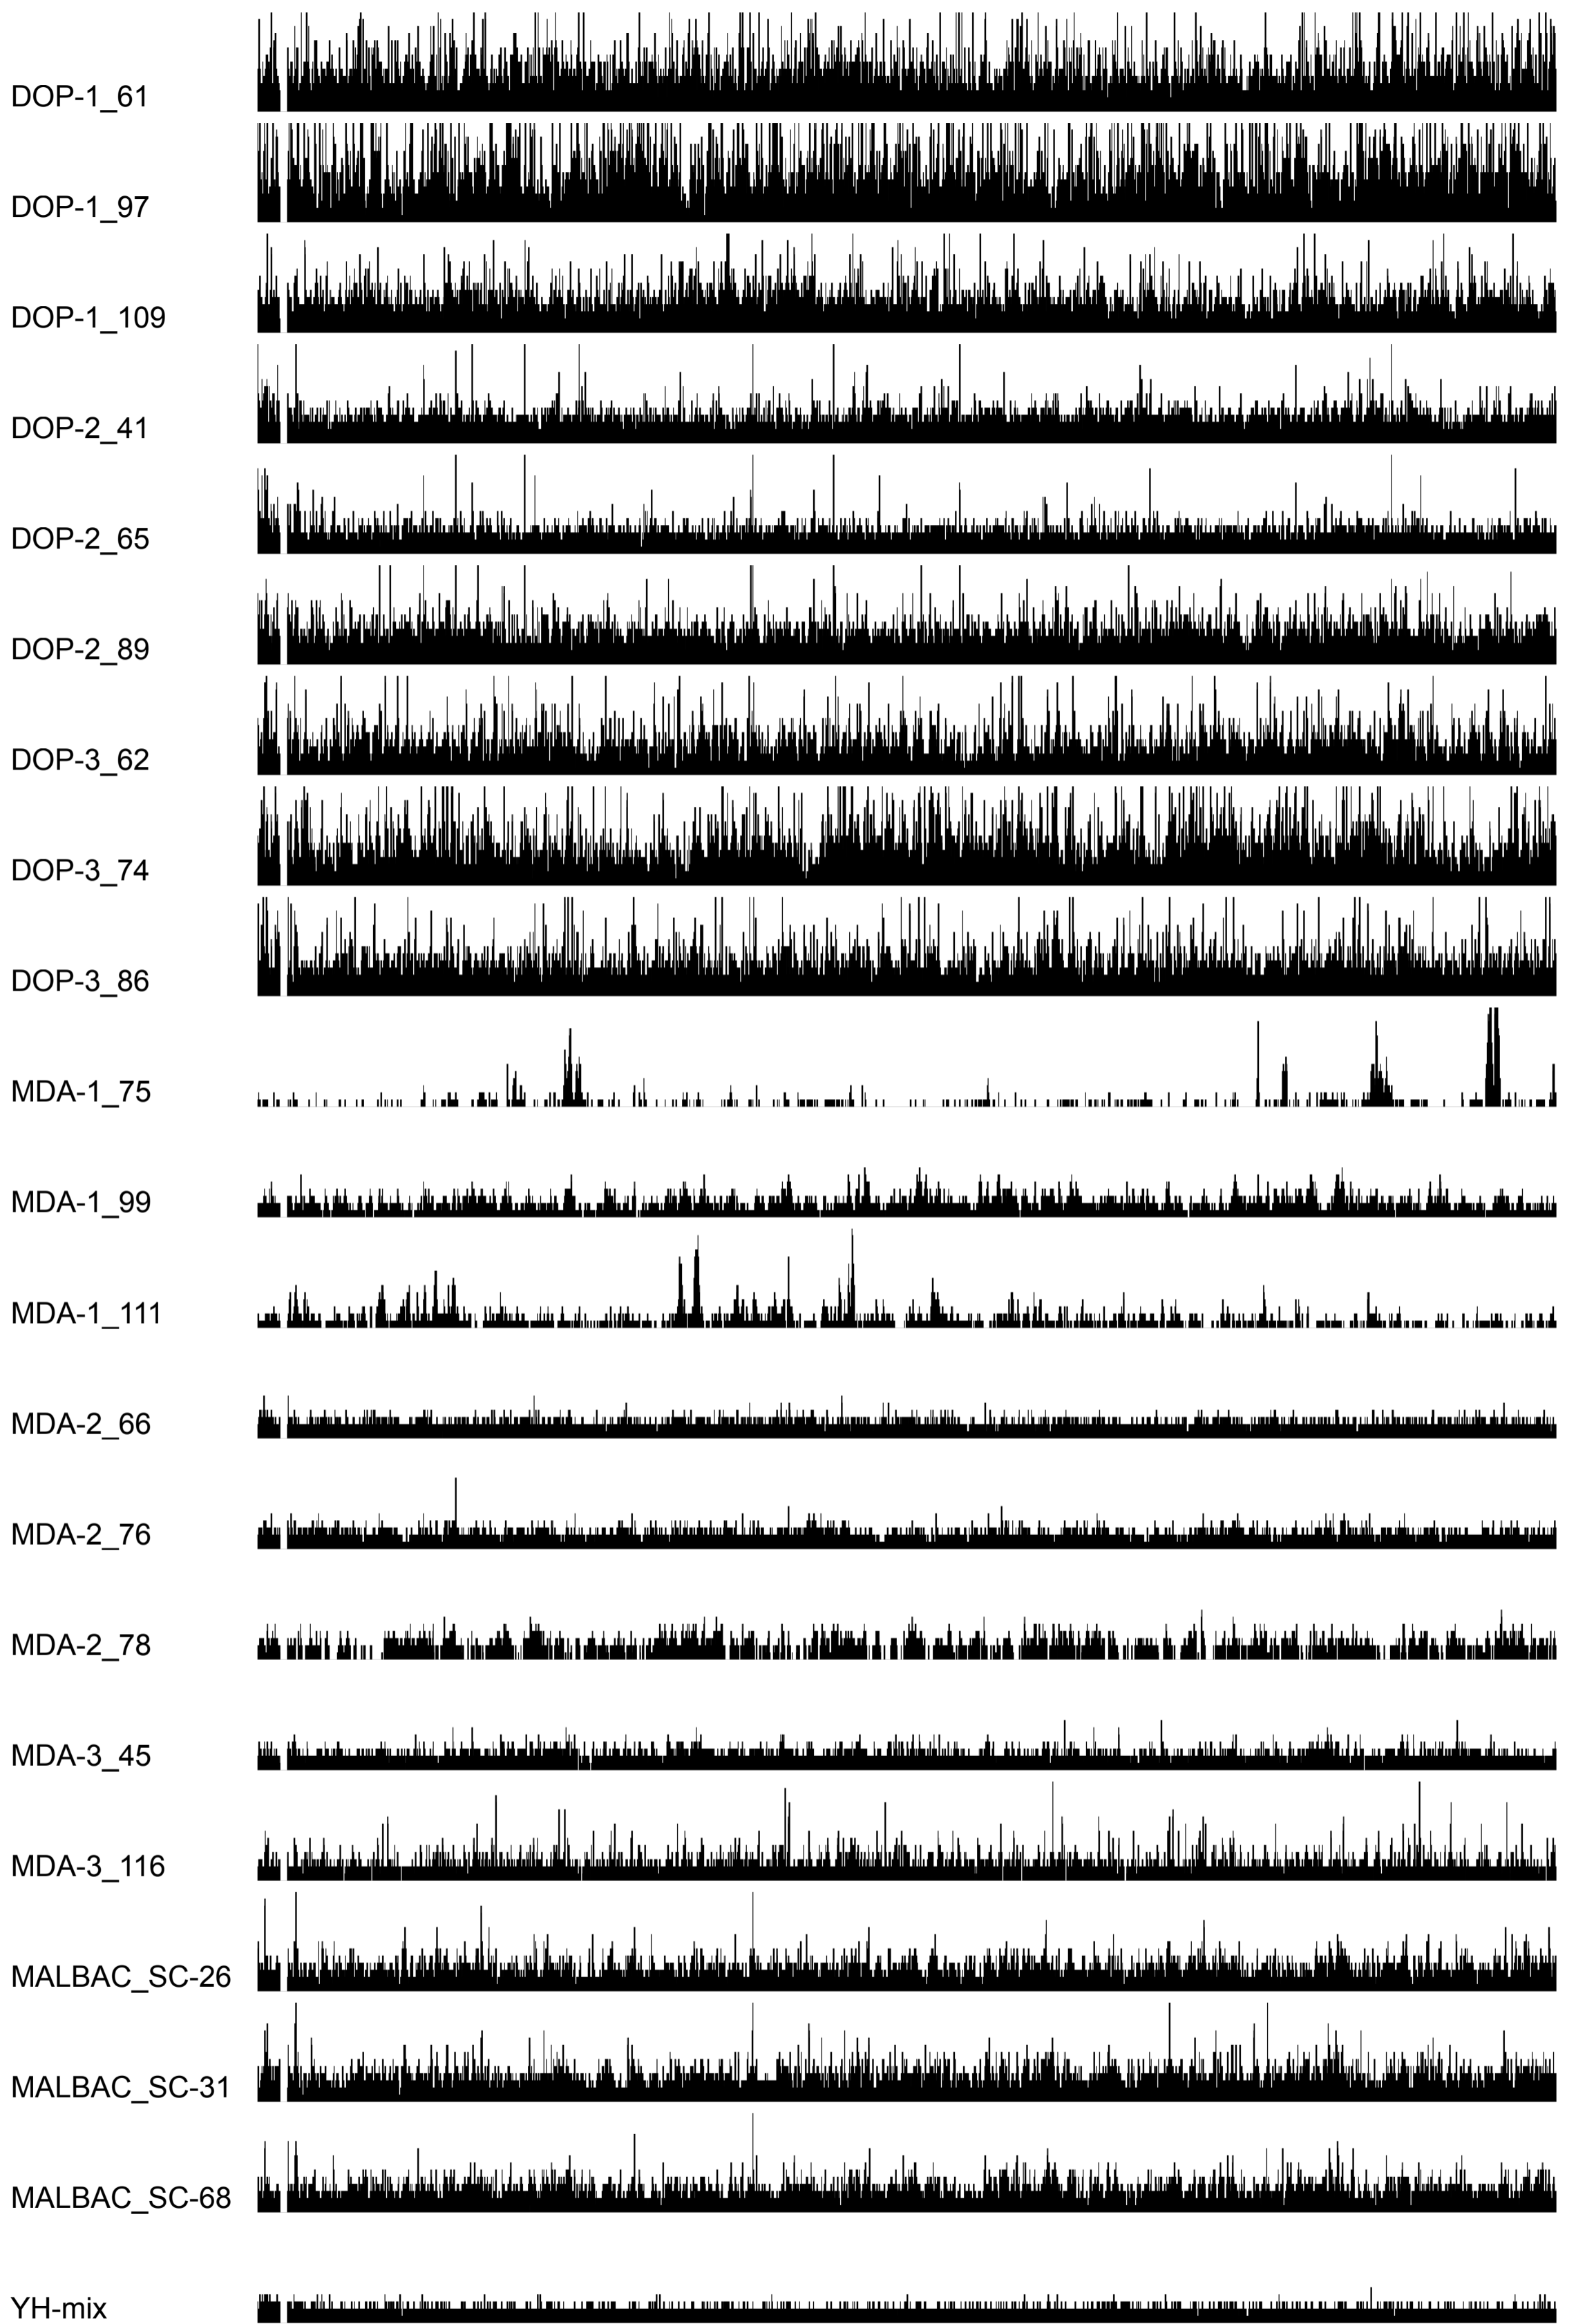

chr15 (q11.1-q26.3) | 15q11.2 | q12 | 15q14 | 15.1 | 15q21.1 | q21.2 | 15q21.3 | 15q22.2 | 22.31 | 15q23 | 24.1 | q25.1 | q25.2 | q25.3 | 15q26.1 | q26.2 | q26.3
