# Supplementary material for: Comparison of variations detection between whole-genome amplification methods used in single-cell resequencing
Source: PubMed Central journal article supplement (PMC4527218; doi:10.1186/s13742-015-0068-3), 2015-08-06
Supplement: 13742_2015_68_MOESM16_ESM.pdf [file 13742_2015_68_MOESM16_ESM.pdf]

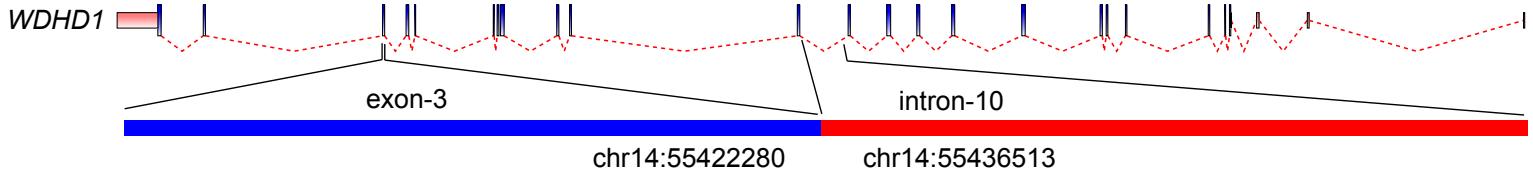

FCD1PE3ACXX.6:1313:13688-99451- GTTACTTG ATGTATTATCTGAAACCCAGCTATATGTCCTCTCAAACACTGAAACCAACCCACAGTACTTTAGGAAGTTAATACACCAACCAAGTGGTTTT

FCD1PE3ACXX.5:2301:17360-90768- GTTACTTG TATGTCCTCTCAAACACTGAAACCAACCCACAGTACTTTAGGAAGTTAATACACCAACCAAGTGGTTTTACTCTGGGATGTAAGTTGGTTC

FCD1PE3ACXX.5:2110:16208:100953- GTTACTTG CCCAGCTATATGTCCTCTCAAACACTGAAACCAACCCACAGTACTTTAGGAAGTTAATACACCAACCAAGTGGTTTTACTCTGGGATGTAAG

FCD1PE3ACXX.6:1216:1284-50482- GTTACTTG ATATGTCCTCTCAAACACTGAAACCAACCCACAGTACTTTAGGAAGTTAATACACCAACCAAGTGGTTTTACTCTGGGATGTAAGTTGNIT

FCD1PE3ACXX.6:2311:3729-86380- GTTACTTG AGGAAGTGAAGAAGAAATCTTAAAAATGTATTATCTGAAACCCAGCTATATGTCCTCTCAAACACTGAAACCAACCCACAGTACTTT

FCD1PE3ACXX.5:1314:19985-9832- GTTTTGAT AACTGAGGAAGTGAAGAAGAAATCTTAAAAATGTATTATCTGAAACCCAGCTATATGTCCTCTCAAACACTGAAACCAACCCACAGTACTTT

FCD1PE3ACXX.5:2110:18113-44622- GTTACTTG TGAACCCAGCTATATGTCCTCTCAAACACTGAAACCAACCCACAGTACTTTAGGAAGTTAATACACCAACCAAGTGGTTTTACTCTGGGGA

FCD1PE3ACXX.6:2108:14989-65281- GTTACTTG TTATCTGAAACCCAGCTATATGTCCTCTCAAACACTGAAACCAACCCACAGTACTTTAGGAAGTTAATACACCAACCAAGTGGTTTTACTCTC

FCD1PE3ACXX.5:1101:4384-69794- GTTACTTG

FCD1PE3ACXX.5:2310:10078-64000- GTTACTTG

FCD1PE3ACXX.5:2211:14084-81088- GTTACTTG

FCD1PE3ACXX.5:1302:5180-89811- GTTACTTG

FCD1PE3ACXX.5:1116:12748-86897- GTTACTTG

FCD1PE3ACXX.6:2201:16771-33351- GTTACTTG

FCD1PE3ACXX.6:2310:10817-73371- GTTACTTG

FCD1PE3ACXX.6:2305:5143-80897- GTTACTTG

FCD1PE3ACXX.5:2107:11585-53391- GGTTCTTT

FCD1PE3ACXX.5:2107:11585-53391- GGTTCTTT

FCD1PE3ACXX.5:2310:10078-64000- GTTACTTG

FCD1PE3ACXX.5:2211:14084-81088- GTTACTTG

FCD1PE3ACXX.5:1302:5180-89811- GTTACTTG

FCD1PE3ACXX.5:1116:12748-86897- GTTACTTG

FCD1PE3ACXX.6:2201:16771-33351- GTTACTTG

FCD1PE3ACXX.6:2310:10817-73371- GTTACTTG

FCD1PE3ACXX.6:2305:5143-80897- GTTACTTG

FCD1PE3ACXX.5:2107:11585-53391- GGTTCTTT
