# Supplementary material for: Comparison of variations detection between whole-genome amplification methods used in single-cell resequencing
Source: PubMed Central journal article supplement (PMC4527218; doi:10.1186/s13742-015-0068-3), 2015-08-06
Supplement: 13742_2015_68_MOESM17_ESM.pdf [file 13742_2015_68_MOESM17_ESM.pdf]

chr1:9121453 chr14:93712482

TTAATTTTTTTGATGACAGATTTCCCTATGTTGCGCAATCTGCTGAACTCCAGGTTGATGAAAGGCCACAAAGGTCAGATCTGTAA  
 CCGAGCTAATTTTAAATTTTTTTGATGACAGATTTCCCTATGTTGCGCAATCTGCTGAACTCCAGGTTGATGAAAGGCCACAAAGGTC  
 ATTTTTTAAATTTTTTTGATGACAGATTTCCCTATGTTGCGCAATCTGCTGAACTCCAGGTTGATGAAAGGCCACAAAGGTCAGATCT  
 CCGAATCTGCTGAACTCCAGGTTGATGAAAGGCCACAAAGGTCAGATCTGTAAAGATGTTCTGCAAGAGGTACTGTTACGCGAATCT  
 CAGATTTCCCTATGTTGCGCAATCTGCTGAACTCCAGGTTGATGAAAGGCCACAAAGGTCAGATCTGTAAAGATGTTCTGCAAGAGGT  
 TTGTGATGACAGATTTCCCTATGTTGCGCAATCTGCTGAACTCCAGGTTGATGAAAGGCCACAAAGGTCAGATCTGTAAAGATGTTCTG  
 TTGTGATGACAGATTTCCCTATGTTGCGCAATCTGCTGAACTCCAGGTTGATGAAAGGCCACAAAGGTCAGATCTGTAAAGATGTTCTG  
 TGGTCTGAACTCCAGGTTGATGAAAGGCCACAAAGGTCAGATCTGTAAAGATGTTCTGCAAGAGGTACTGTTACGCGAATCTCCAGGC  
 GAGACAGATTTCCCTATGTTGCGCAATCTGCTGAACTCCAGGTTGATGAAAGGCCACAAAGGTCAGATCTGTAAAGATGTTCTGCAAGAG

FCC1L5EACXX:5:2306:3476:20327#CTTATAT

FCC1L5EACXX:5:1916:4077:50552#TAATGTTG ..... FCC1L5EACXX:5:2306:3476:20327#CTTATAT  
 FCC1L5EACXX:5:1916:4077:50552#TAATGTTG ..... FCC1L5EACXX:5:1316:4077:50552#TAATGTTG

FCD1R7MACXX:7:2114:15277:50400#TAATGTTG ..... FCD1R7MACXX:7:2114:15277:50400#TAATGTTG  
 FCC1L5EACXX:5:2114:18001:39708#TAATGTTG ..... FCC1L5EACXX:5:2114:18001:39708#TAATGTTG  
 FCC1L5EACXX:6:1112:9759:63729#TAATGTTG ..... FCC1L5EACXX:6:1112:9759:63729#TAATGTTG  
 FCC1L5EACXX:6:2311:17652:46878#TAATGTTG ..... FCC1L5EACXX:6:2311:17652:46878#TAATGTTG  
 FCD1R7MACXX:8:2206:1536:46463#TAATGTTG ..... FCD1R7MACXX:8:2206:1536:46463#TAATGTTG  
 FCC1L5EACXX:5:2206:19711:95782#TAATGTTG ..... FCC1L5EACXX:5:2206:19711:95782#TAATGTTG  
 FCD1R7MACXX:7:2315:15669:52537#TAATGTTG ..... FCD1R7MACXX:7:2315:15669:52537#TAATGTTG  
 FCC1L5EACXX:6:1212:20960:40139#TAATGTTG ..... FCC1L5EACXX:6:1212:20960:40139#TAATGTTG  
 FCD1R7MACXX:7:2206:10599:11677#TAATGTTG ..... FCD1R7MACXX:7:2206:10599:11677#TAATGTTG  
 FCD1R7MACXX:7:1113:10323:36267#TAATGTTG ..... FCD1R7MACXX:7:1113:10323:36267#TAATGTTG  
 FCC1L5EACXX:5:1209:9357:61842#TAATGTTG ..... FCC1L5EACXX:5:1209:9357:61842#TAATGTTG  
 FCD1R7MACXX:8:1208:17725:35628#TAATGTTG ..... FCD1R7MACXX:8:1208:17725:35628#TAATGTTG  
 FCC1L5EACXX:5:1314:10098:61144#TAATGTTG ..... FCC1L5EACXX:5:1314:10098:61144#TAATGTTG  
 FCD1R7MACXX:8:2314:11434:90735#TAATGTTG ..... FCD1R7MACXX:8:2314:11434:90735#TAATGTTG  
 FCC1L5EACXX:6:1211:4077:86265#TAATGTTG ..... FCC1L5EACXX:6:1211:4077:86265#TAATGTTG  
 FCD1R7MACXX:7:1110:8724:95105#TAATGTTG ..... FCD1R7MACXX:7:1110:8724:95105#TAATGTTG  
 FCC1L5EACXX:5:2204:10751:17271#TAATGTTG ..... FCC1L5EACXX:5:2204:10751:17271#TAATGTTG  
 FCD1R7MACXX:7:2111:18802:94882#TAATGTTG ..... FCD1R7MACXX:7:2111:18802:94882#TAATGTTG  
 FCD1R7MACXX:7:2103:1457:29585#TAATGTTG ..... FCD1R7MACXX:7:2103:1457:29585#TAATGTTG  
 FCD1R7MACXX:7:1212:11285:6762#TAATGTTG ..... FCD1R7MACXX:7:1212:11285:6762#TAATGTTG  
 FCD1R7MACXX:8:2102:6356:47719#TAATGTTG ..... FCD1R7MACXX:8:2102:6356:47719#TAATGTTG  
 FCC1L5EACXX:5:2310:18993:74683#TAATGTTG ..... FCC1L5EACXX:5:2310:18993:74683#TAATGTTG  
 FCC1L5EACXX:6:2102:6084:36028#TAATGTTG ..... FCC1L5EACXX:6:2102:6084:36028#TAATGTTG  
 FCC1L5EACXX:5:1209:13223:73094#TAATGTTG ..... FCC1L5EACXX:5:1209:13223:73094#TAATGTTG  
 FCD1R7MACXX:8:2208:12332:97707#TAATGTTG ..... FCD1R7MACXX:8:2208:12332:97707#TAATGTTG  
 FCD1R7MACXX:7:1110:4930:63764#TAATGTTG ..... FCD1R7MACXX:7:1110:4930:63764#TAATGTTG  
 FCC1L5EACXX:5:2207:2973:97522#TAATGTTG ..... FCC1L5EACXX:5:2207:2973:97522#TAATGTTG  
 FCD1R7MACXX:7:1211:16353:70216#TAATGTTG ..... FCD1R7MACXX:7:1211:16353:70216#TAATGTTG
